# Supplementary material
Source: PubMed Central journal article supplement (PMC8673872)
Supplement: mmc1.pdf [file mmc1.pdf]

# THE LANCET

## Child & Adolescent Health

### **Supplementary appendix**

This appendix formed part of the original submission. We post it as supplied by the authors.

Supplement to: Gurdasani D, Akrami A, Bradley VC, et al. Long in COVID children.  
*Lancet Child Adolesc Health* 2022; **6**: e2.

**Table 1: Summary of long COVID prevalence studies in children**

|                            | CLoCk study <sup>1</sup>                                                            | ONS study <sup>2</sup>                                                                                                      | Buonsenso et al. <sup>3</sup>                                                | Miller et al. <sup>4</sup>                       | Radke et al. <sup>5</sup>                           | Molteni et al. <sup>6</sup>                          |
|----------------------------|-------------------------------------------------------------------------------------|-----------------------------------------------------------------------------------------------------------------------------|------------------------------------------------------------------------------|--------------------------------------------------|-----------------------------------------------------|------------------------------------------------------|
| Study design               | Case-control study, England                                                         | Community-based sampling from the UK                                                                                        | Community-based, Italy.                                                      | Household cohort, England and Wales,             | 55 randomly selected schools, Switzerland           | Symptom based survey using Zoe symptom tracker app   |
| Representativeness         | More females and older children (16-17-yr-olds) responded                           | Sampled, and weighted to be representative of UK population                                                                 | Convenience sample. Children with severe neuro-cognitive impairment excluded | Non-representative, higher socio-economic status | Randomly sampled schools                            | Poor representation of ethnic minorities. Higher SES |
| Case ascertainment         | SARS-CoV-2 test positive between Jan 2021 and March 2021 and test-negative controls | Asymptomatic and symptomatic PCR positivity                                                                                 | PCR positivity                                                               | PCR positivity and serology                      | Positive serology                                   | Symptom based, PCR positivity                        |
| Sample size                | 23,048 cases, and 27,798 controls                                                   | 3,403 2-16 yr old with positive PCR test)                                                                                   | 129 <=18 years PCR positive > 30 days prior                                  | 4,678 (175 with confirmed infection)             | 1,355 (109 seropositive)                            | 1,734 (PCR or LFD positive) and 1,734 controls       |
| Response rate              | 13.4%                                                                               | Unclear                                                                                                                     | Unclear, convenience sample                                                  | Unclear                                          | 54%                                                 | 25%                                                  |
| Symptoms assessed directly | 20 symptoms                                                                         | (1)12 symptoms, and (2) self-reported persistent symptoms                                                                   | 41 (Assessment by paediatricians)                                            | Open ended only                                  | ?8 (unclear)                                        | 19 symptoms + free text                              |
| Prevalence among infected  | At 3 months: 66.5 (any symptoms) 30.3% (3+ symptoms)                                | One or more of 12 symptoms<br>At 5 weeks: 3.8% (2-11 yrs) 4.8% (12-16 yrs)<br>At 12 weeks: 0.7% (2-11 yrs) 1.2% (12-16 yrs) | <=18 years 42.6% at >60 days                                                 | <=17 year olds 4.6% at 4 weeks                   | In 6-16 year olds: 9.4% at 4 weeks 3.7% at 12 weeks | In 5-17 year olds: 4% at 4 weeks, 1.8% at 12 weeks   |

|                        |                                                                                                                                                                                        |                                                                                                                                         |                                                                                                                                     |                                                                                                                      |                                                                                                                                          |                                                                                                                                         |
|------------------------|----------------------------------------------------------------------------------------------------------------------------------------------------------------------------------------|-----------------------------------------------------------------------------------------------------------------------------------------|-------------------------------------------------------------------------------------------------------------------------------------|----------------------------------------------------------------------------------------------------------------------|------------------------------------------------------------------------------------------------------------------------------------------|-----------------------------------------------------------------------------------------------------------------------------------------|
|                        |                                                                                                                                                                                        | Self-reported long COVID<br>At 4 weeks:<br>1.9% (2-11 yrs)<br>4.7% (12-16 yr)<br><br>At 12 weeks:<br>1.7% (2-11 yrs)<br>5.7% (12-16 yr) |                                                                                                                                     |                                                                                                                      |                                                                                                                                          |                                                                                                                                         |
| Prevalence in controls | 53.3% (any symptoms)<br>16.2% (3+ symptoms)                                                                                                                                            | At 5 weeks:<br>2.1% (2-11 yrs)<br>1.1% (12-16 yrs)                                                                                      | No control group                                                                                                                    | <=17 year olds<br>1.7% at 4 weeks                                                                                    | In 6-16 year olds:<br>9.7% at 4 weeks<br>2.2% at 12 weeks                                                                                | In 5-17 year olds:<br>0.9% at 4 weeks                                                                                                   |
| Gaps allowed           | Waxing and waning allowed. No criteria for gaps.                                                                                                                                       | 2 consecutive follow ups without symptoms                                                                                               | Unspecified                                                                                                                         | Unspecified-relapsing and remitting symptoms considered                                                              | Unclear in reported methodology                                                                                                          | 1 week                                                                                                                                  |
| Follow up              | Retrospective: 3 months after positive or negative test                                                                                                                                | Weekly up to 4 weeks, and monthly up to a year.                                                                                         | Assessed on average 5.4 months later.                                                                                               | Retrospective – recall from February 2020.                                                                           | Retrospective: 5-7 months previously.                                                                                                    | Up to 5 months, Last report considered symptom resolution.                                                                              |
| Comments on biases     | Test negatives may have had other viral illnesses, recall bias, poor response rate (direction of bias depends on whether healthy individuals more or less likely to have participated) | Limited number of symptoms assessed, recall bias, asymptomatic acute infections assessed. Likely underestimate                          | Possible overestimation, retrospective, lack of controls, ascertainment of cohort unclear, possible selection bias and recall bias. | Likely underestimate<br>Non-representative, retrospective, misclassification bias, no direct assessment of symptoms. | Likely underestimate<br>Misclassification due to serological testing, retrospective nature, recall bias, and limited symptoms reporting. | Likely underestimate<br>Non-representative, poor response, common symptoms not assessed, relapsing and remitting nature not considered. |

## References

- 1 Stephenson T, Pereira S, Shafran R et al. Long covid—the physical and mental health of children and non-hospitalised young people 3 months after SARS-CoV-2 infection; a national matched cohort study (The CLoCk) Study.2021. doi:10.21203/rs.3.rs-798316/v1
- 2 Office for National Statistics. Technical article: Updated estimates of the prevalence of post-acute symptoms among people with coronavirus (COVID-19) in the UK: 26 April 2020 to 1 August 2021
- 3 Buonsenso D, Munblit D, De Rose C, et al. Preliminary evidence on long COVID in children. *Acta Paediatr* 2021; **110**(7): 2208-11
- 4 Miller F NV, Navaratnam AMD Shrotri M, Kovar J, Hayward AC. Prevalence of persistent symptoms in children during the COVID-19 pandemic: evidence from a household cohort study in England and Wales. *MedRxiv* 2021.
- 5 Radtke T, Ulyte A, Puhan MA, Kriemler S. Long-term Symptoms After SARS-CoV-2 Infection in Children and Adolescents. *JAMA* 2021.
- 6 Molteni E SC, Canas LS, Bhopal SS, Hughes RC, Antonelli M. Illness duration and symptom profile in symptomatic UK school-aged children tested for SARS-CoV-2. *The Lancet Child and Adolescent Health* 2021.
